# Supplementary material for: Impact of TMB/PD-L1 expression and pneumonitis on chemoradiation and durvalumab response in stage III NSCLC
Source: Springer Nature journal article supplement (doi:10.1038/s41467-023-39874-8), 2023-07-15
Supplement: MOESM1 [file 41467_2023_39874_MOESM1_ESM.pdf]

## Supplementary Information

Impact of TMB, PD-L1 expression, and pneumonitis on outcomes to chemoradiation and durvalumab in stage III NSCLC

Alessi, et al

### **Contents**

Supplementary Figures. 1-17

Supplementary Tables. 1-6

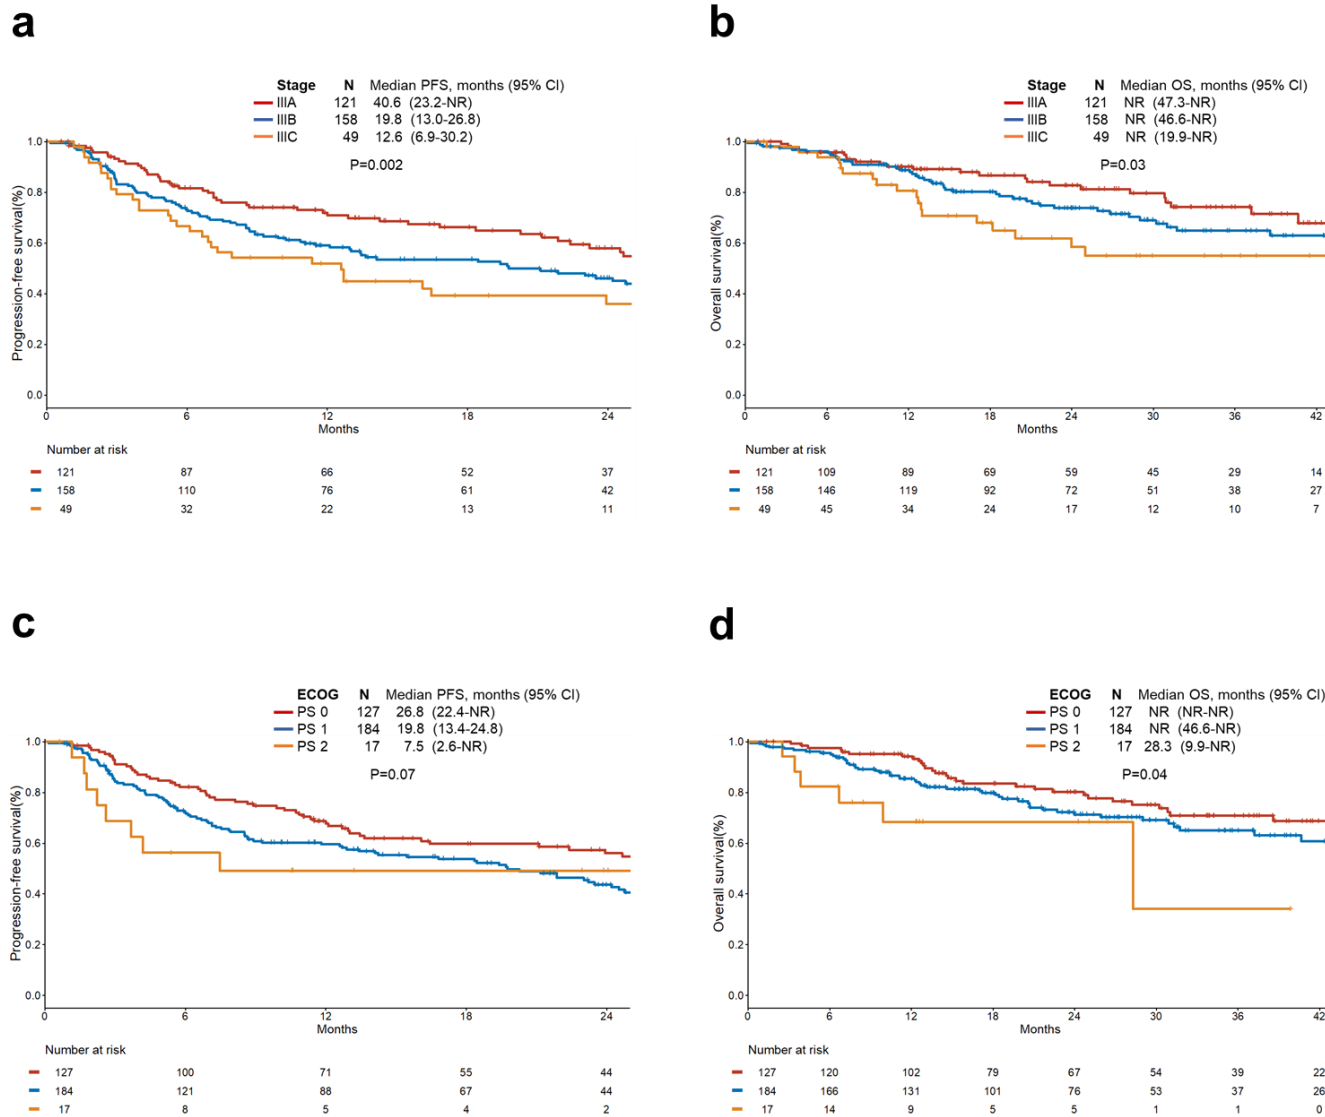

Supplementary Figure 1. **Impact of clinicopathologic factors on outcomes to chemoradiation and durvalumab.** Progression-free (PFS), and overall survival (OS) according to **(a-b)** disease stage and **(c-d)** ECOG PS in patients treated with chemoradiation and durvalumab. P-values were calculated using log-rank analysis. NR, not reached. Source data are provided as a Source Data file.

**a**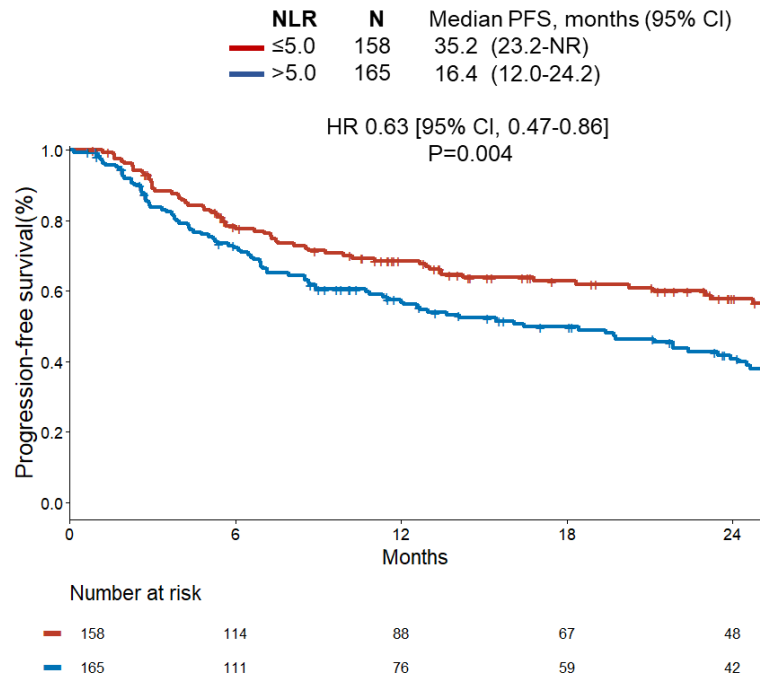**b**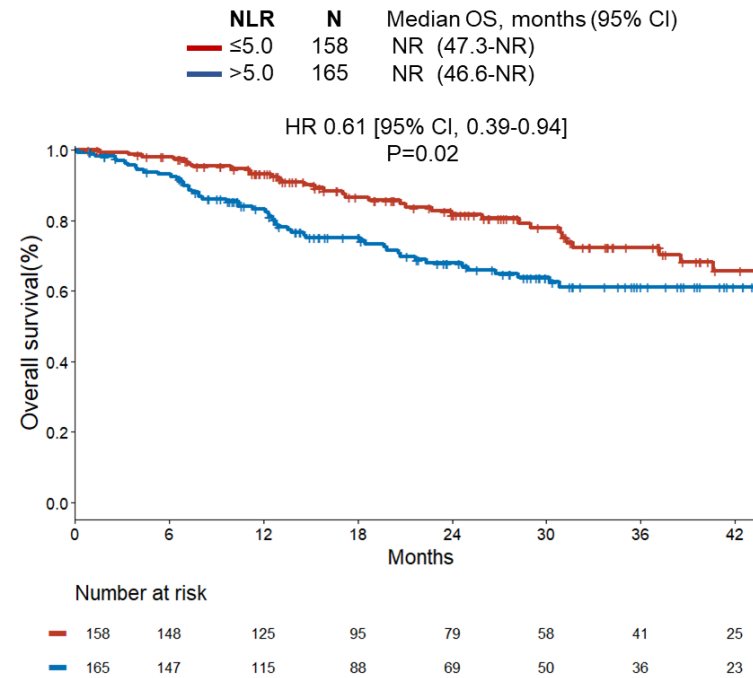

Supplementary Figure 2. **Outcomes to chemoradiation and durvalumab according to NLR level.** (a) Progression-free (PFS) and (b) overall survival (OS) according to neutrophil-lymphocyte ratio (NLR) prior to durvalumab initiation. Hazard ratio (HR) and P-values were calculated using unadjusted Cox proportional hazard regression models. NR, not reached. Source data are provided as a Source Data file.

**a**

Pairwise comparisons between PD-L1 expression groups in terms of local-regional control at 24-months.

| PD-L1 TPS groups | HR   | CI (95%)  | P-value |
|------------------|------|-----------|---------|
| ≥90% vs 50-89%   | 0.50 | 0.14-1.85 | 0.30    |
| ≥90% vs 1-49%    | 0.32 | 0.09-1.10 | 0.07    |
| ≥90% vs <1%      | 0.26 | 0.08-0.86 | 0.03    |
| 50-89% vs 1-49%  | 0.62 | 0.27-1.41 | 0.30    |
| 50-89% vs <1%    | 0.51 | 0.24-1.11 | 0.09    |
| 1-49% vs <1%     | 0.83 | 0.43-1.58 | 0.57    |

**b**

Pairwise comparisons between PD-L1 expression groups in terms of distant control at 24-months.

| PD-L1 TPS groups | HR   | CI (95%)  | P-value |
|------------------|------|-----------|---------|
| ≥90% vs 50-89%   | 0.66 | 0.29-1.54 | 0.30    |
| ≥90% vs 1-49%    | 0.45 | 0.21-0.97 | 0.04    |
| ≥90% vs <1%      | 0.37 | 0.17-0.79 | 0.01    |
| 50-89% vs 1-49%  | 0.65 | 0.36-1.18 | 0.20    |
| 50-89% vs <1%    | 0.62 | 0.36-1.09 | 0.10    |
| 1-49% vs <1%     | 1.12 | 0.71-1.76 | 0.62    |

Supplementary Figure 3. **Local-regional and distant control rates according to PD-L1 expression groups.** Pairwise comparisons between PD-L1 expression groups in terms of **(a)** local-regional and **(b)** distant control at 24-months. Hazard ratio (HR) and P-values were calculated using unadjusted Cox proportional hazard regression models. Source data are provided as a Source Data file.

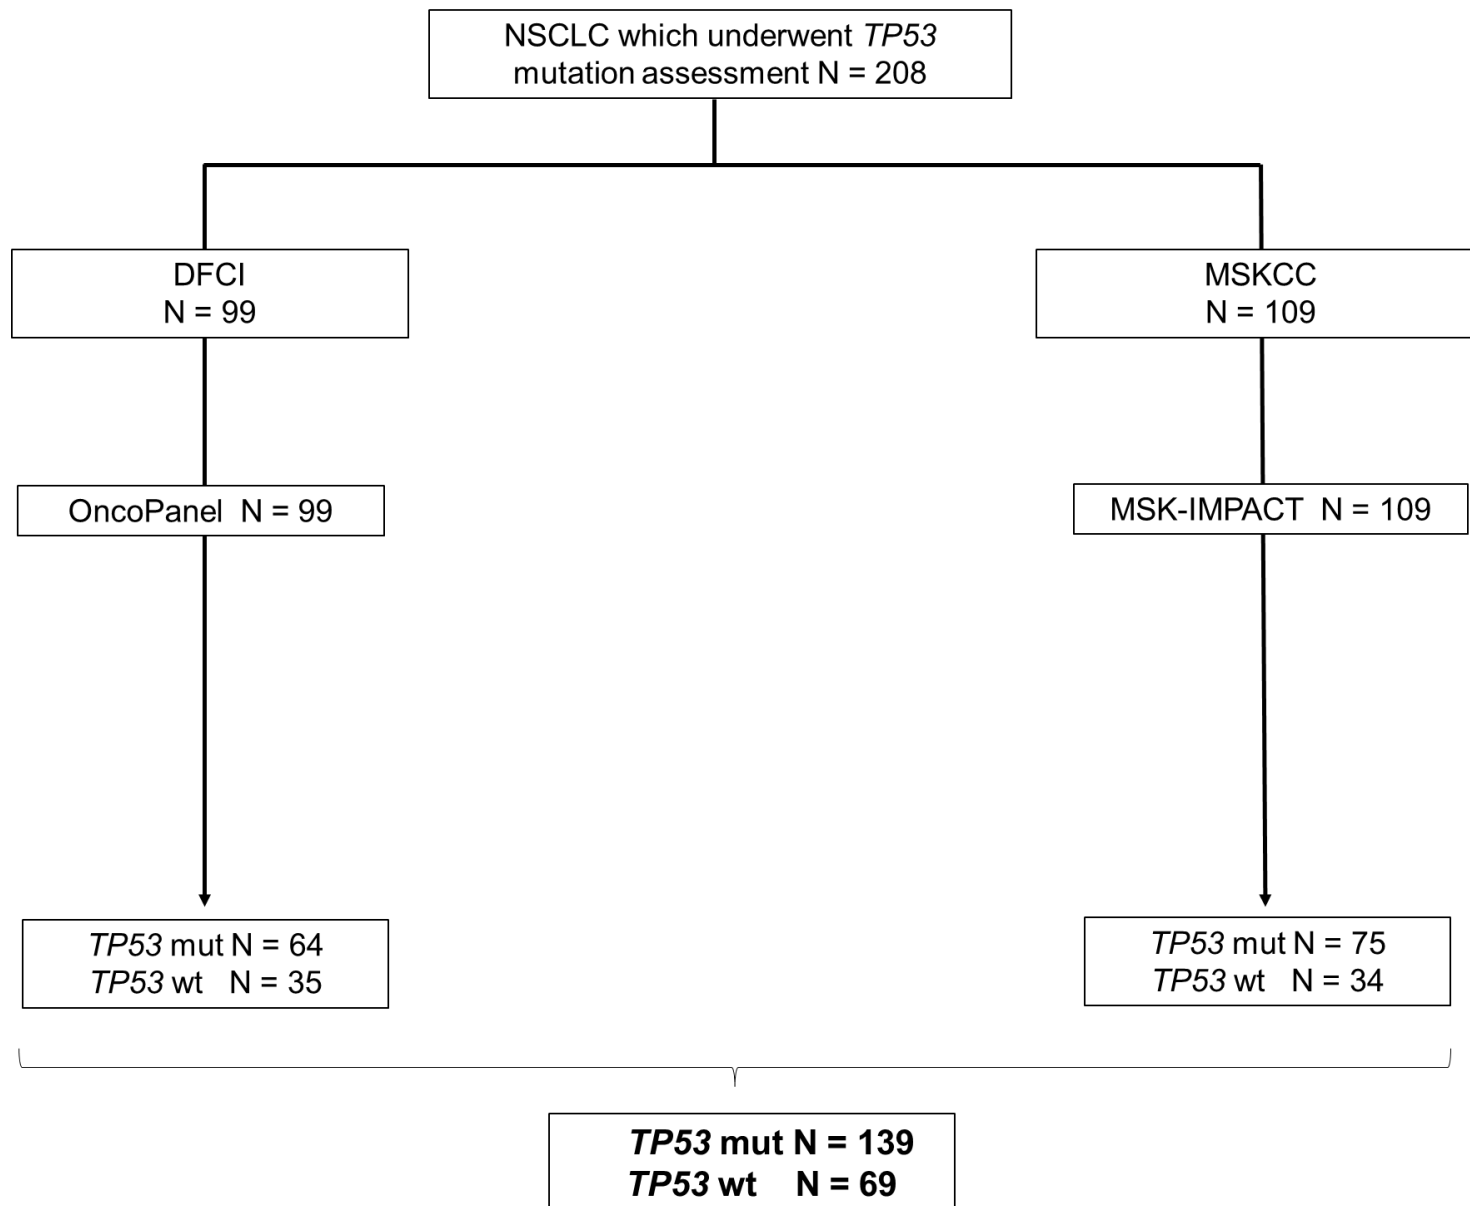

Supplementary Figure 4. **Consort diagram** showing the cohorts of patients in whom *TP53* mutation status was determined. DFCI, Dana-Farber Cancer Institute; MSKCC, Memorial Sloan Kettering Cancer Center.

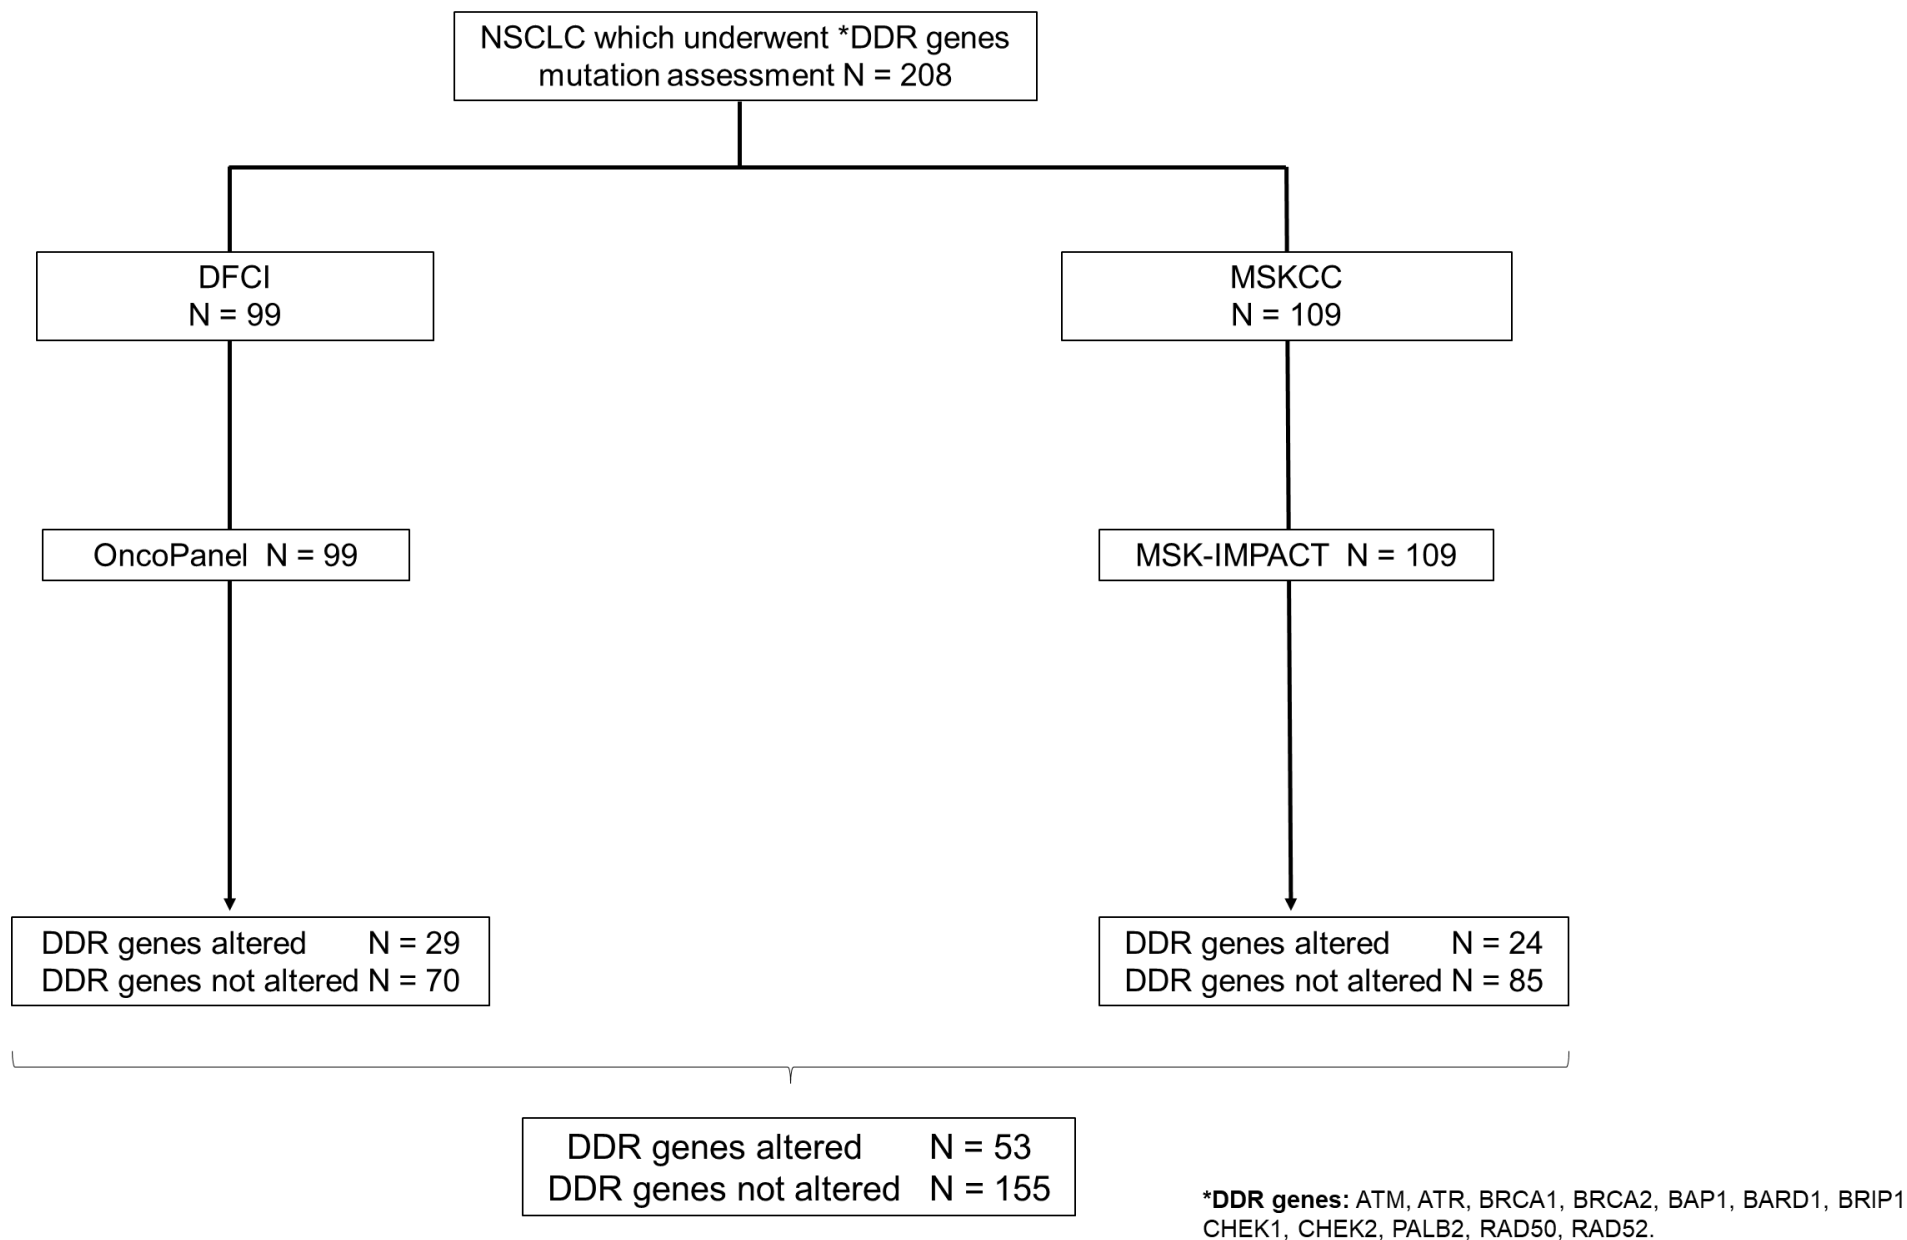

Supplementary Figure 5. **Consort diagram** showing the cohorts of patients in whom DNA-damage repair (DDR) mutation status was determined. DFCI, Dana-Farber Cancer Institute; MSKCC, Memorial Sloan Kettering Cancer Center.

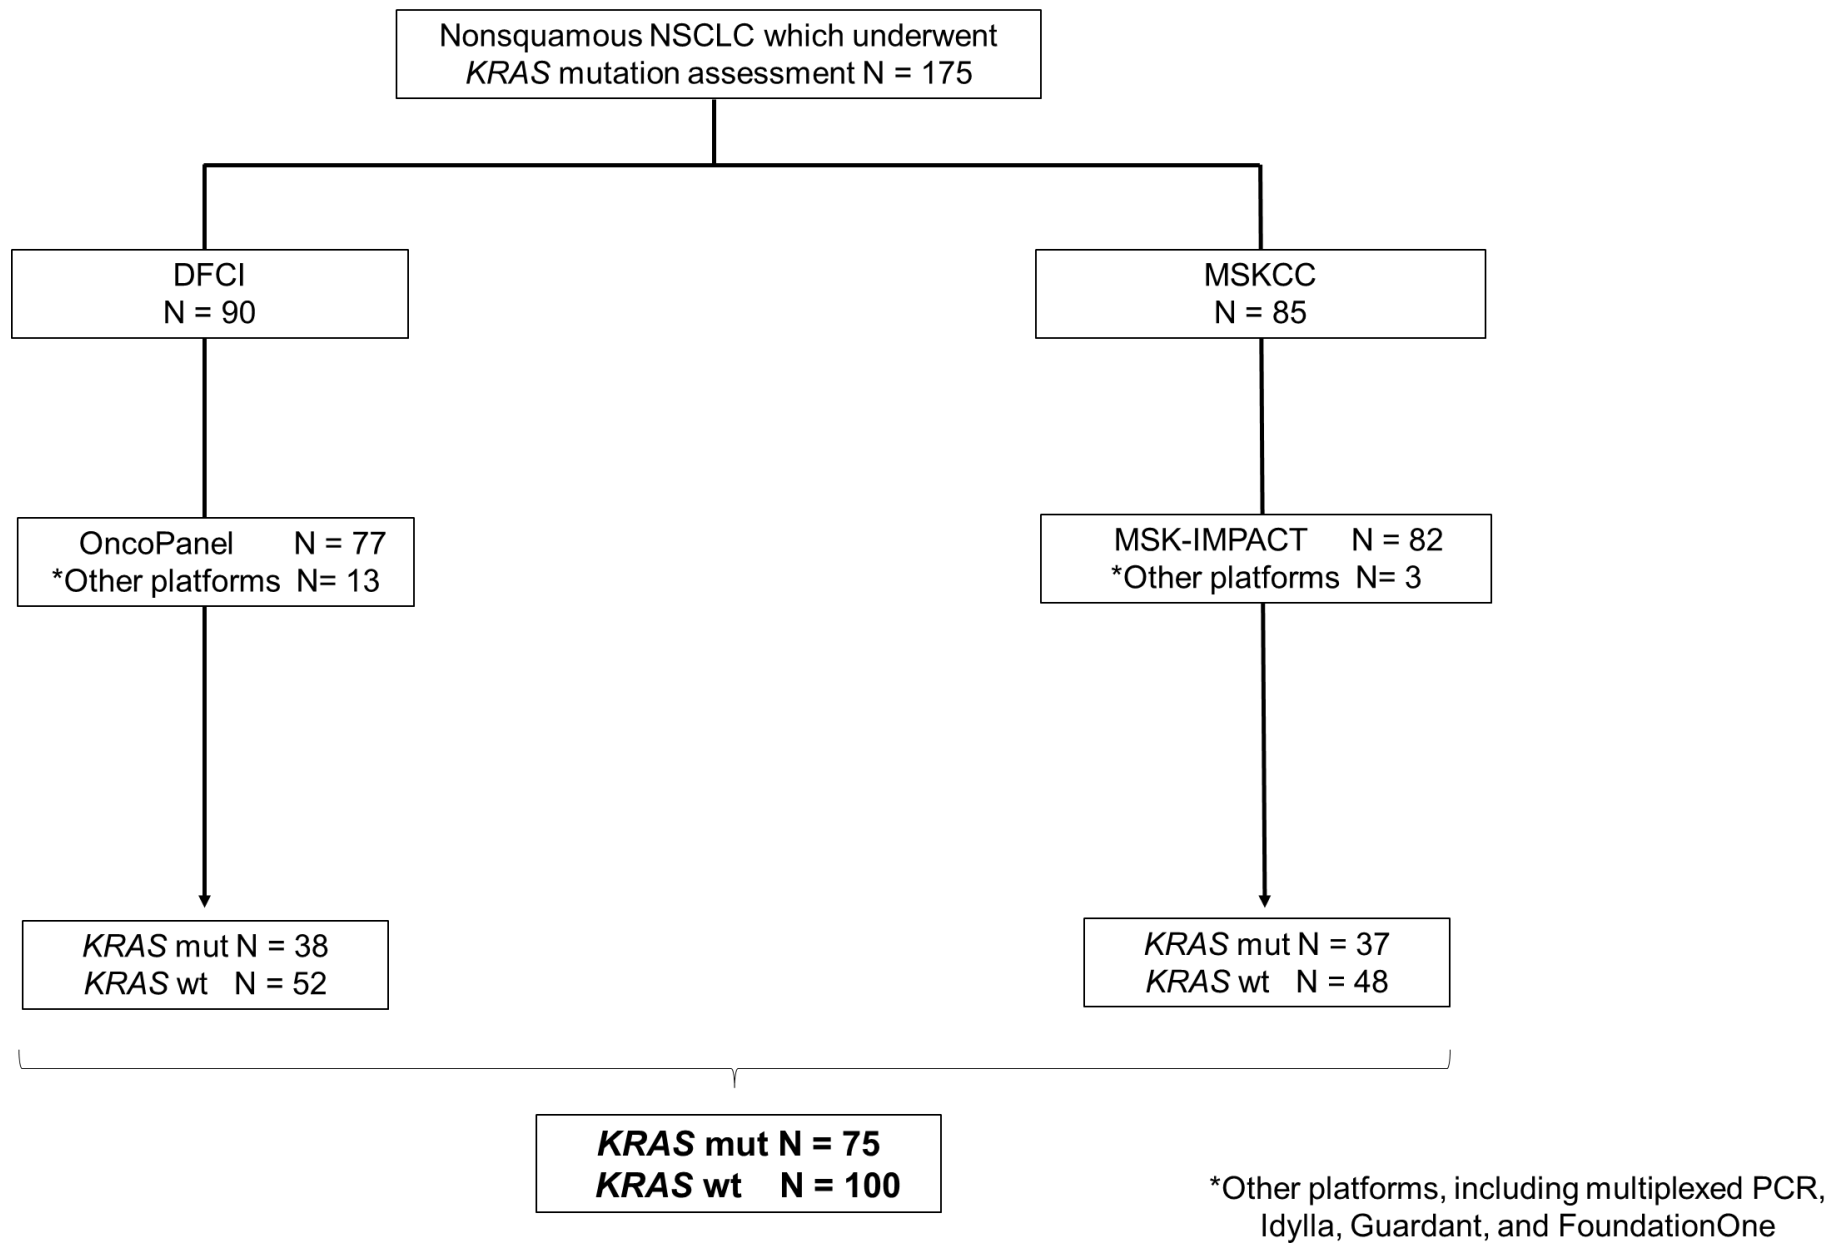

Supplementary Figure 6. **Consort diagram** showing the cohorts of patients in whom *KRAS* mutation status was determined. DFCI, Dana-Farber Cancer Institute; MSKCC, Memorial Sloan Kettering Cancer Center.

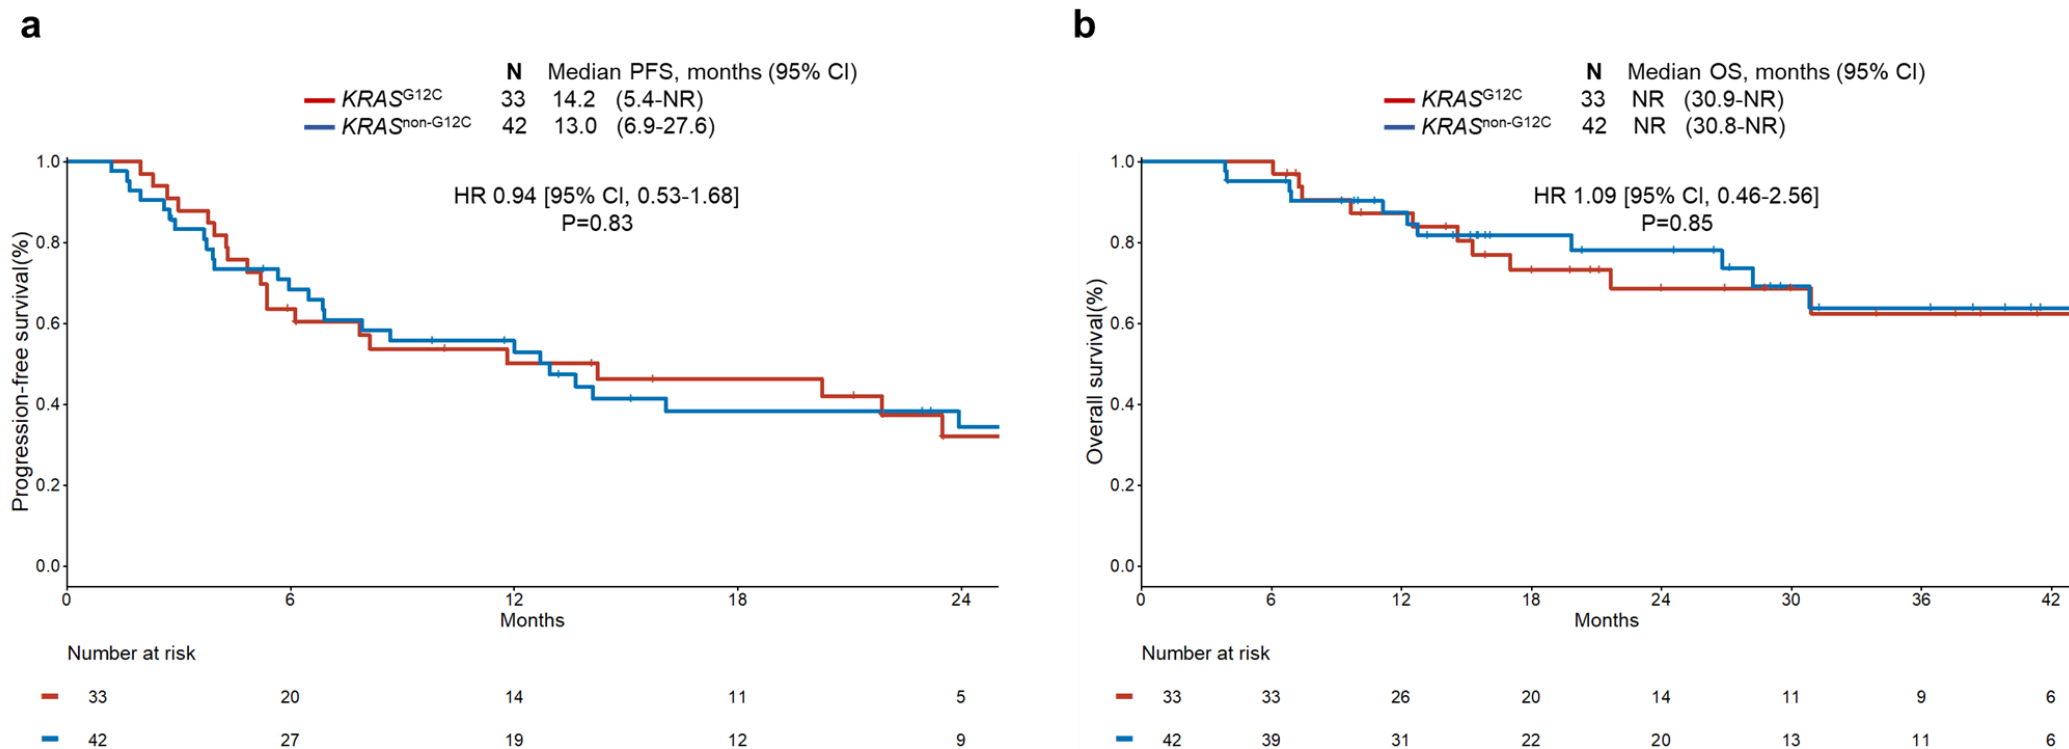

Supplementary Figure 7. **Outcomes to chemoradiation and durvalumab in *KRAS*<sup>G12C</sup> vs *KRAS*<sup>non-G12C</sup>.** (a) Progression-free (PFS) and (b) overall survival (OS) to durvalumab consolidation by *KRAS* allele subtypes (*KRAS*<sup>G12C</sup> vs *KRAS*<sup>non-G12C</sup>). Data are presented as the hazard ratio (HR) with error bars showing 95% confidence interval (CI). HR and P-values were calculated using unadjusted Cox proportional hazard regression models. Source data are provided as a Source Data file.



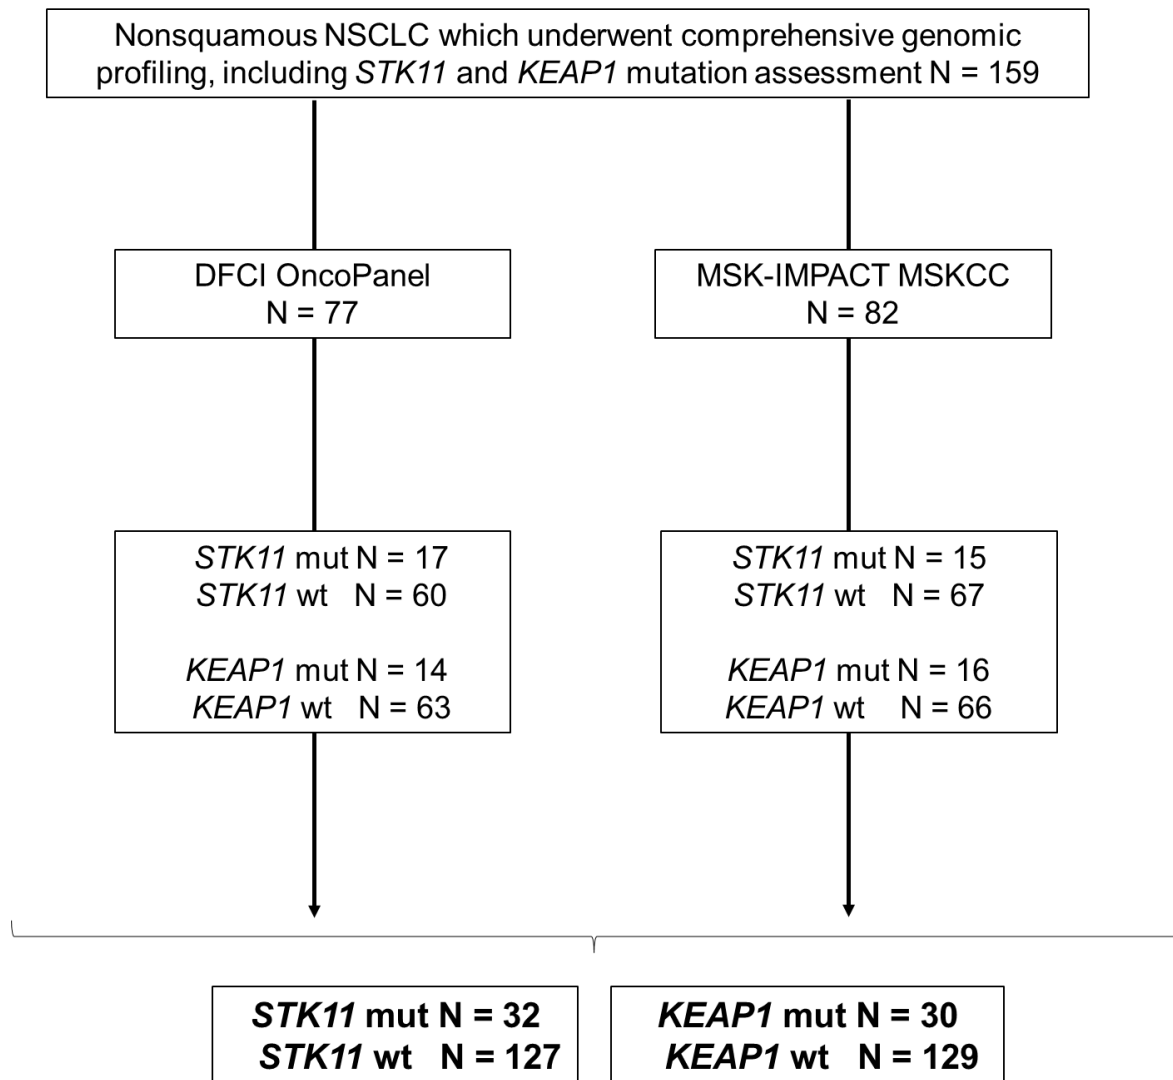

Supplementary Figure 8. **Consort diagram** showing the cohorts of patients in whom *STK11* and *KEAP1* mutation status were determined. DFCI, Dana-Farber Cancer Institute; MSKCC, Memorial Sloan Kettering Cancer Center.

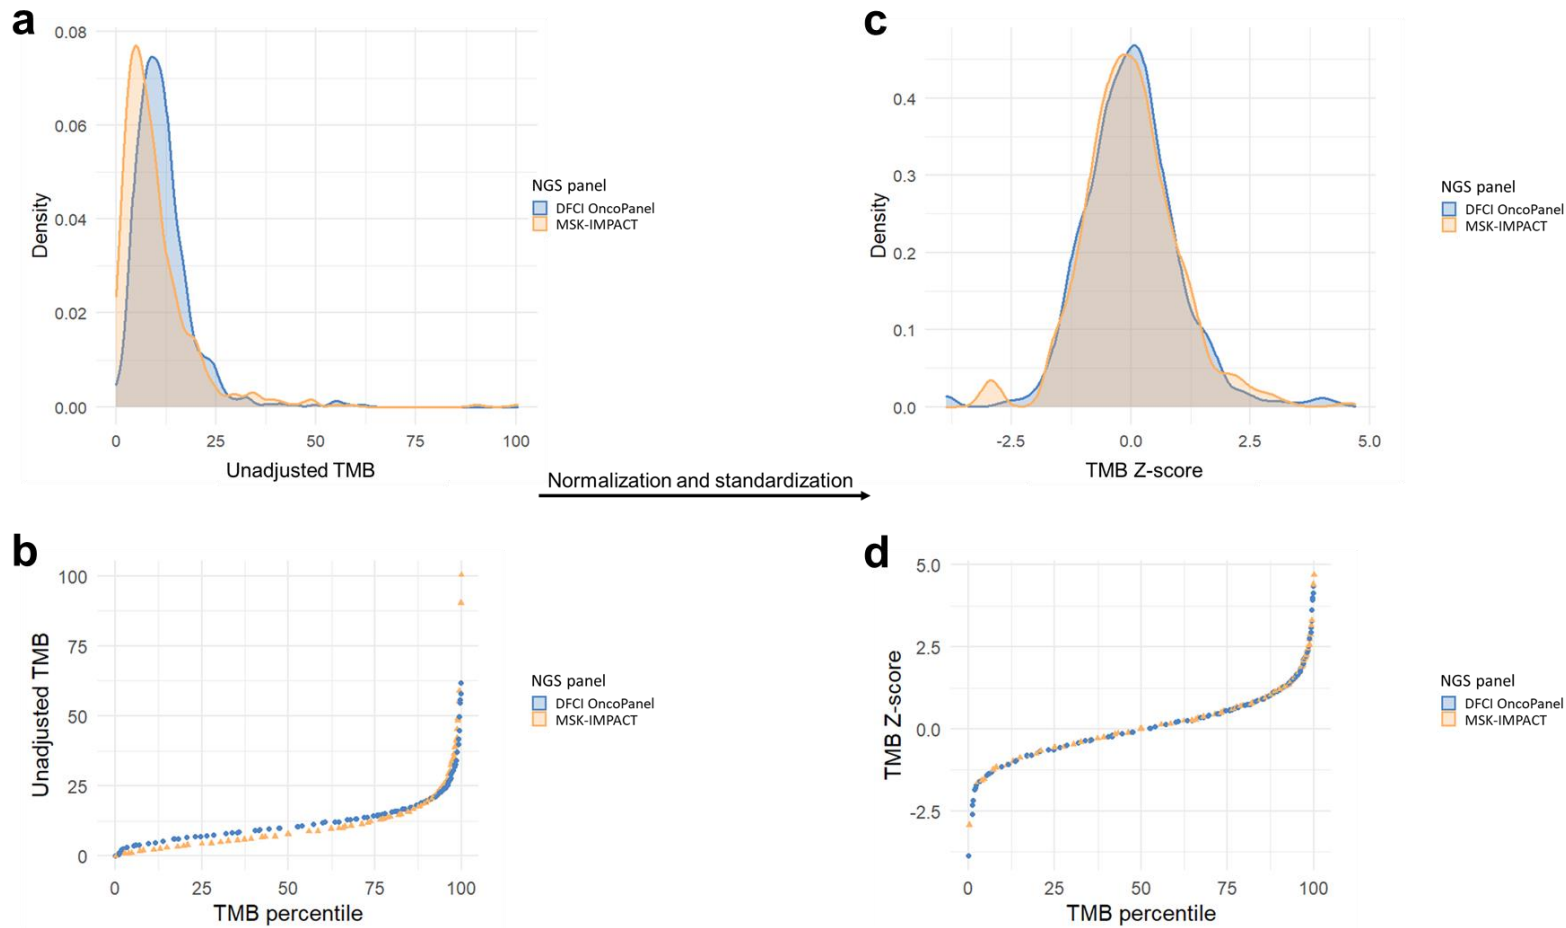

Supplementary Figure 9. **Normalization and standardization of TMB distributions bring the Next Generation Sequencing (DFCI-OncoPanel and MSK-IMPACT) distributions into alignment.** The left side shows the Kernel density plot of unadjusted TMB values in each cohort (**a-b**), and the right side shows the transformed density plot of TMB Z-scores that demonstrate high overlap (**c-d**).

## MSKCC cohort

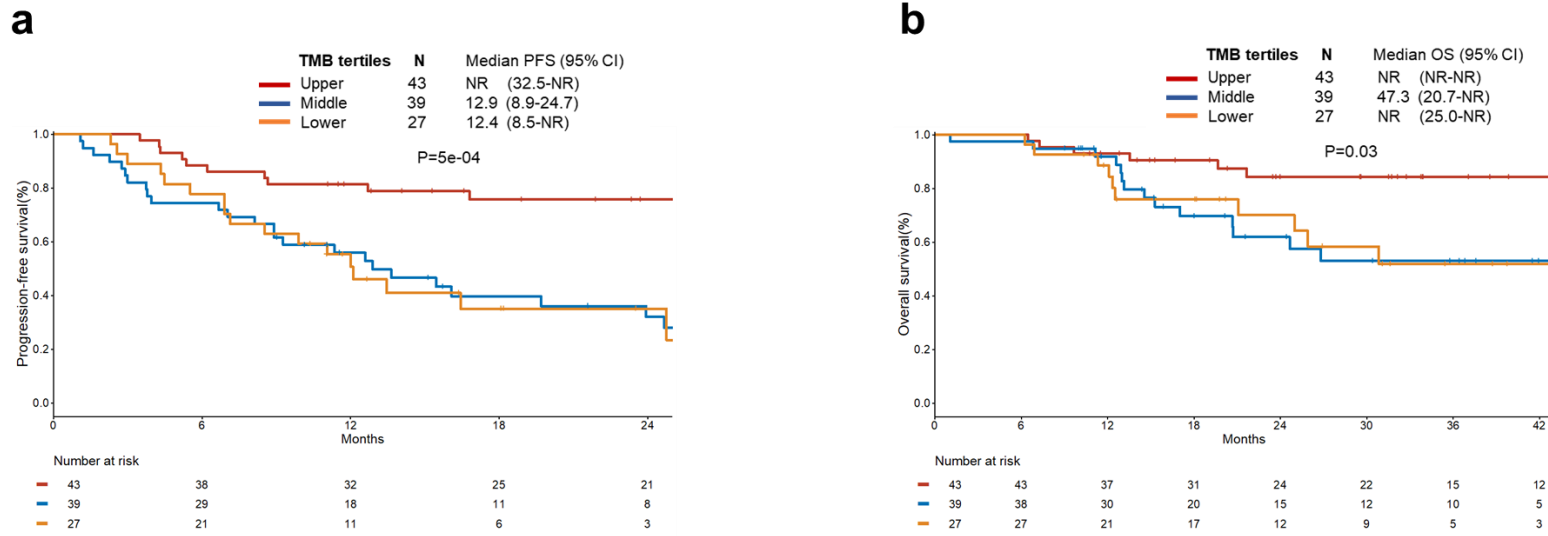

## DFCI cohort

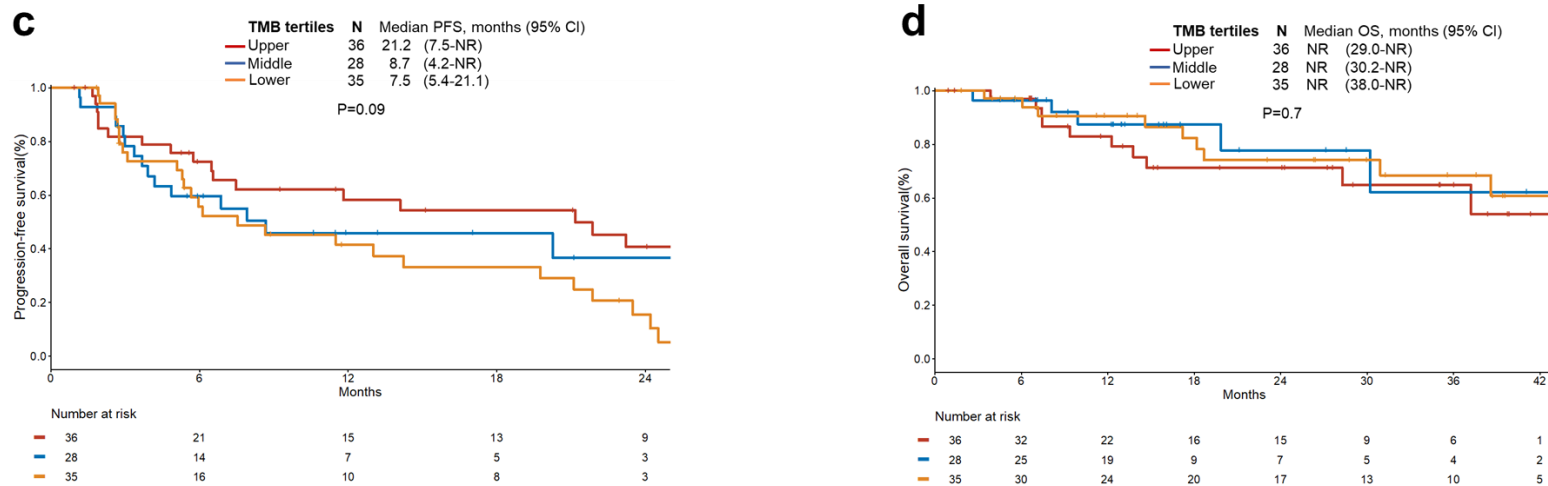

Supplementary Figure 10. **Outcomes to chemoradiation and durvalumab according to TMB tertiles.** Progression-free (PFS) and overall survival (OS) by TMB tertiles in MSKCC cohort (**a-b**) and in the DFCI cohort (**c-d**). P-values were calculated using log-rank analysis. NR, not reached. Source data are provided as a Source Data file.

## Cohort (N=191)

$R=0.058$ ;  $P=0.46$

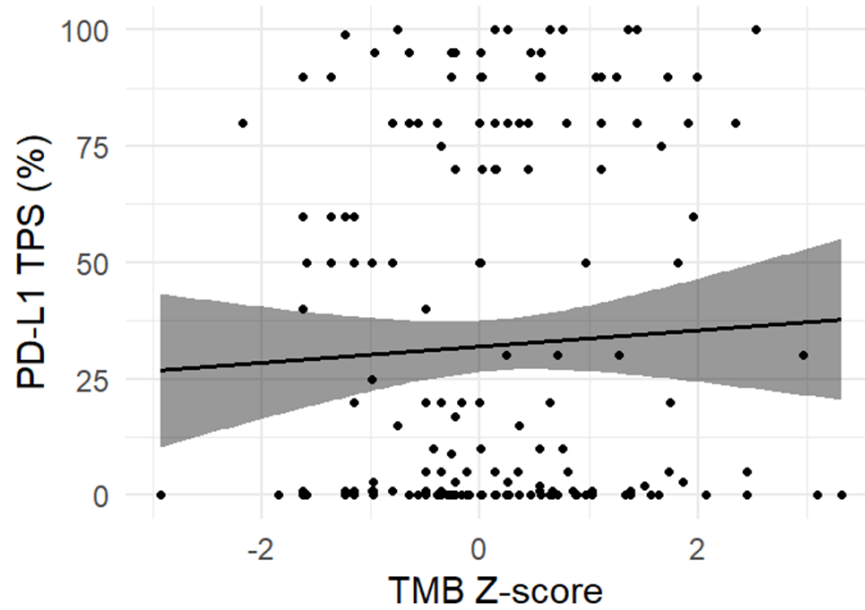

Supplementary Figure 11. **Spearman's rank test.** Spearman's correlation coefficient ( $R$ ) between PD-L1 TPS (%) and TMB Z-score as continuous variable. P-values were calculated using log-rank analysis. Source data are provided as a Source Data file.

**a**

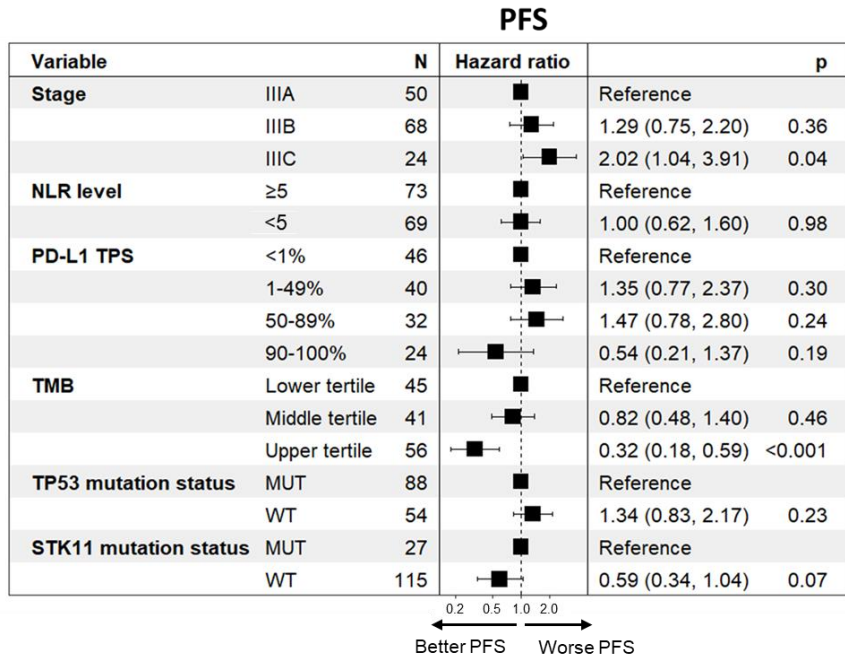

**b**

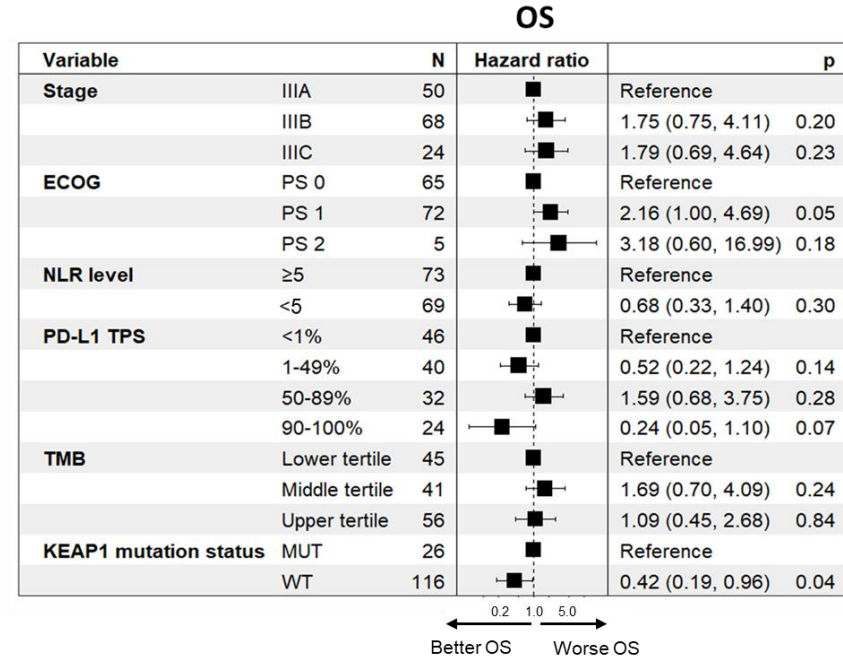

Supplementary Figure 12. **Multivariable Cox regression analysis.** Forest plot for **(a)** progression-free and **(b)** overall survival in multivariable Cox regression analysis in the cohort of patients with stage III nonsquamous NSCLC treated with chemoradiation and durvalumab. Data are presented as the hazard ratio (HR) with error bars showing 95% confidence interval (CI). HR and P-values were calculated using adjusted Cox proportional hazard regression models. Source data are provided as a Source Data file.

**a**

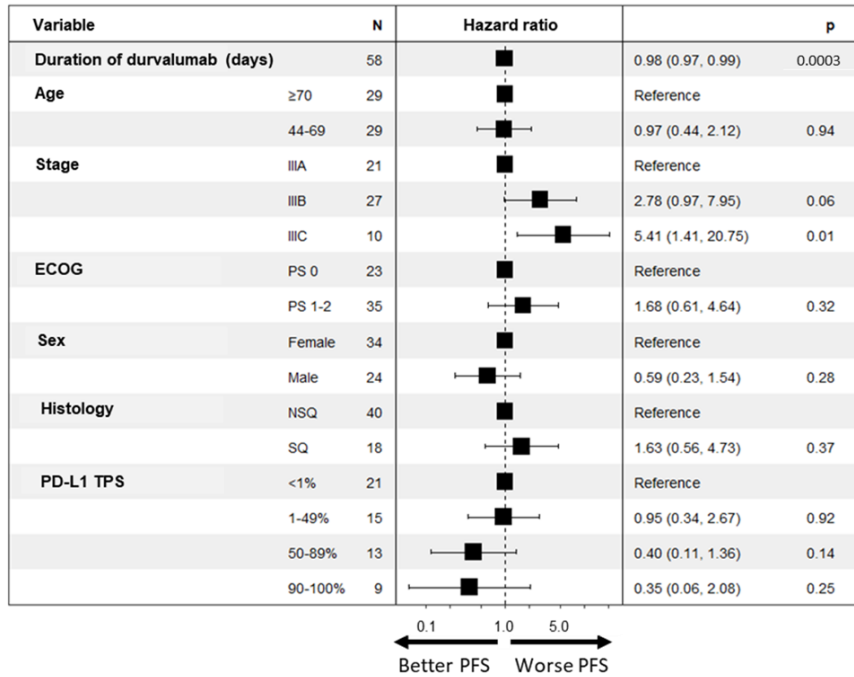

**b**

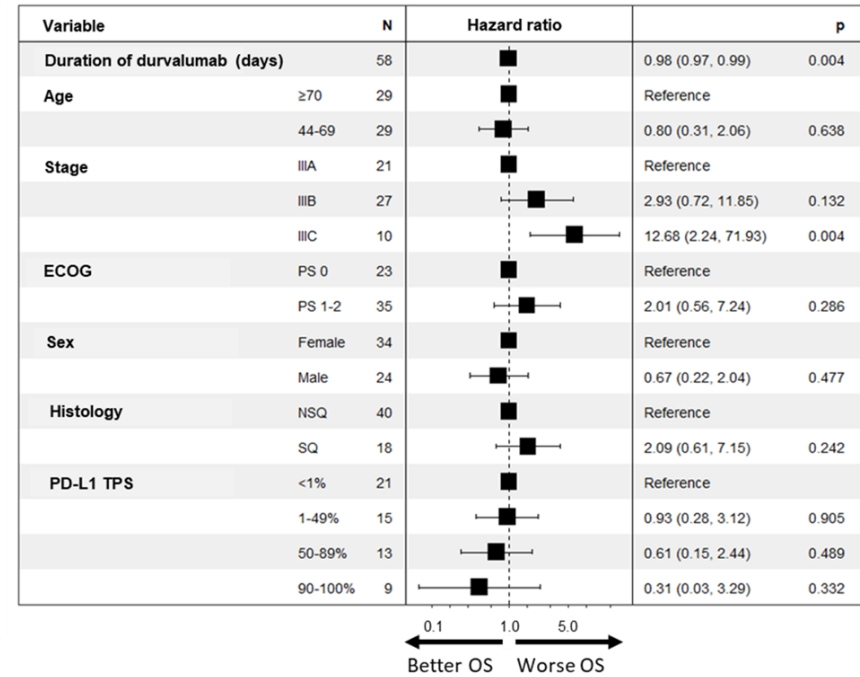

Supplementary Figure 13. **Multivariable Cox regression analysis.** Forest plot for **(a)** progression-free and **(b)** overall survival in multivariable Cox regression analysis including duration of durvalumab treatment prior to discontinuation as a continuous time-dependent variable. Data are presented as the hazard ratio (HR) with error bars showing 95% confidence interval (CI). HR and P-values were calculated using adjusted Cox proportional hazard regression models. Source data are provided as a Source Data file.

**a**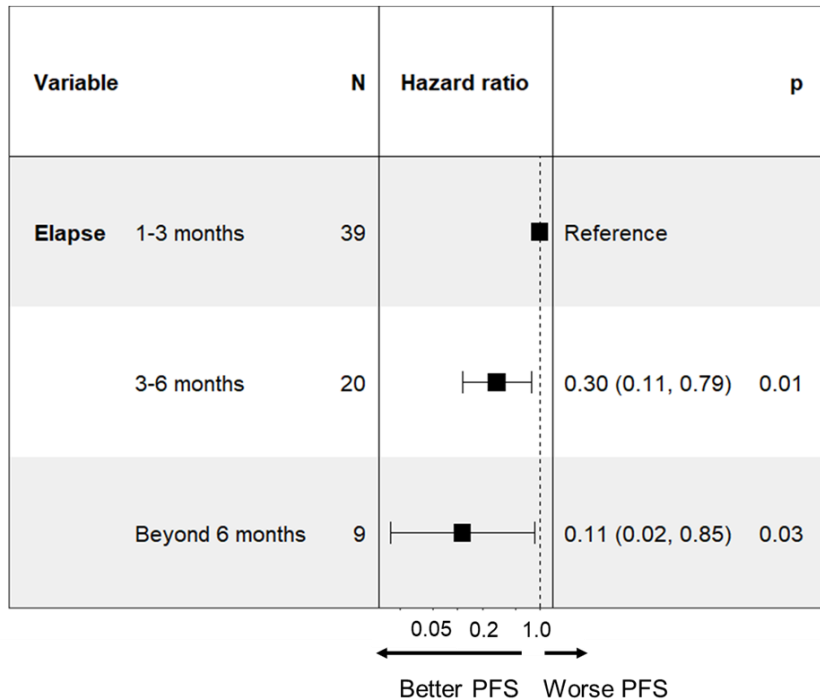**b**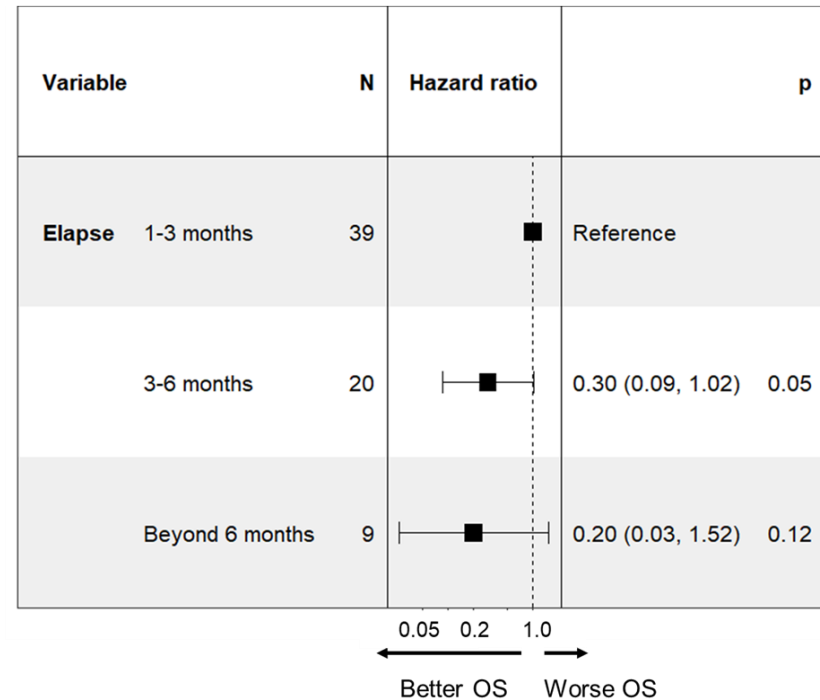

Supplementary Figure 14. **Association of pneumonitis and its timing with disease outcomes.** Forest plot for **(a)** progression-free and **(b)** overall survival in time-dependent Cox regression model of patients who developed pneumonitis including its latency as an ordinal variable (<3 months vs 3-6 months vs >6 months). Hazard ratio (HR) and P-values were calculated using unadjusted Cox proportional hazard regression models. Source data are provided as a Source Data file.

**a**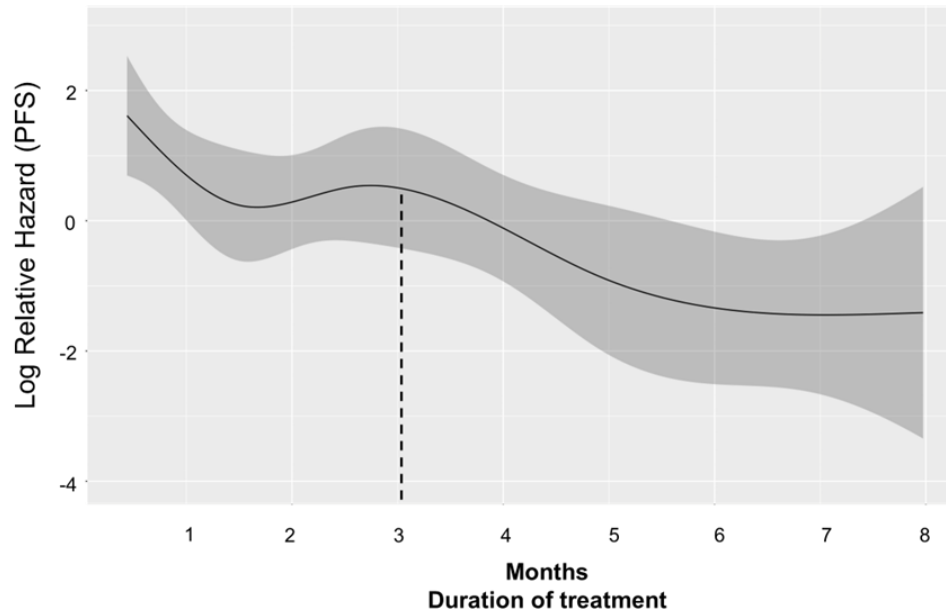**b**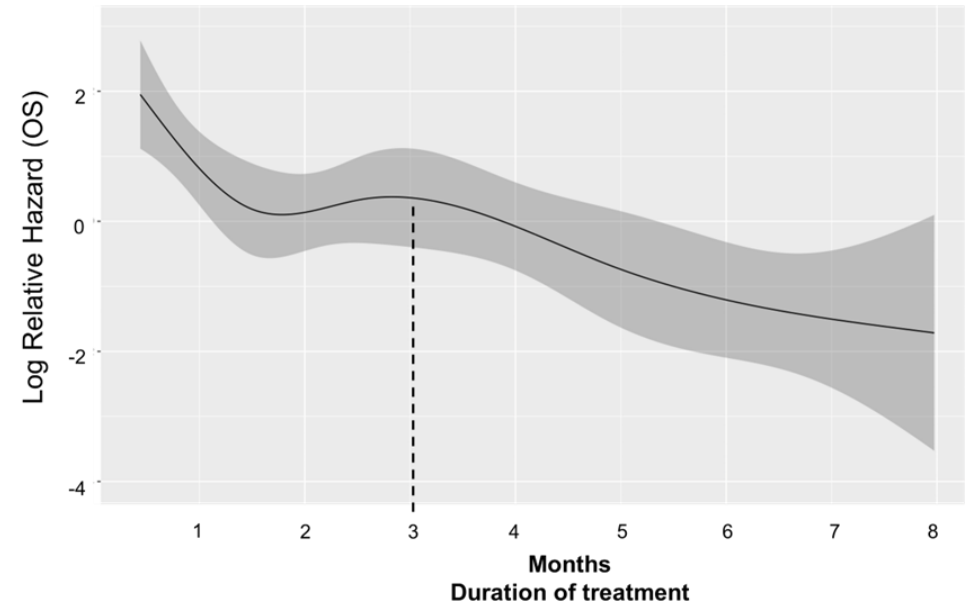

Supplementary Figure 15. **Cubic Spline Regression.** Hazard ratio of duration of durvalumab treatment from **(a)** progression-free survival (PFS) and **(b)** overall survival (OS) in univariable Cox model. Restricted cubic spline was applied to duration of durvalumab treatment with the reference of 3 months (early vs late-onset pneumonitis). 95% confidence intervals are reported under each curve estimates and as shadowed area from the restricted-cubic-spline model. Source data are provided as a Source Data file.



**a**

| Pneumonitis | N  | Median PFS, months (95% CI) |
|-------------|----|-----------------------------|
| Late-onset  | 29 | NR (NR-NR)                  |
| Early-onset | 39 | 10.4 (6.2-NR)               |

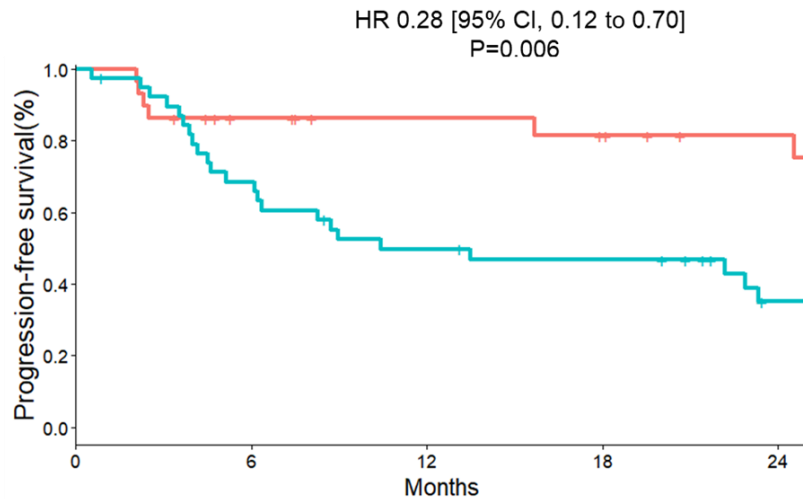

| Number at risk |    | 0  | 6  | 12 | 18 | 24 |
|----------------|----|----|----|----|----|----|
| —              | 29 | 21 | 18 | 16 | 13 |    |
| —              | 39 | 26 | 18 | 16 | 8  |    |

**b**

| Pneumonitis | N  | Median OS, months (95% CI) |
|-------------|----|----------------------------|
| Late-onset  | 29 | NR (NR-NR)                 |
| Early-onset | 39 | 36.2 (12.1-NR)             |

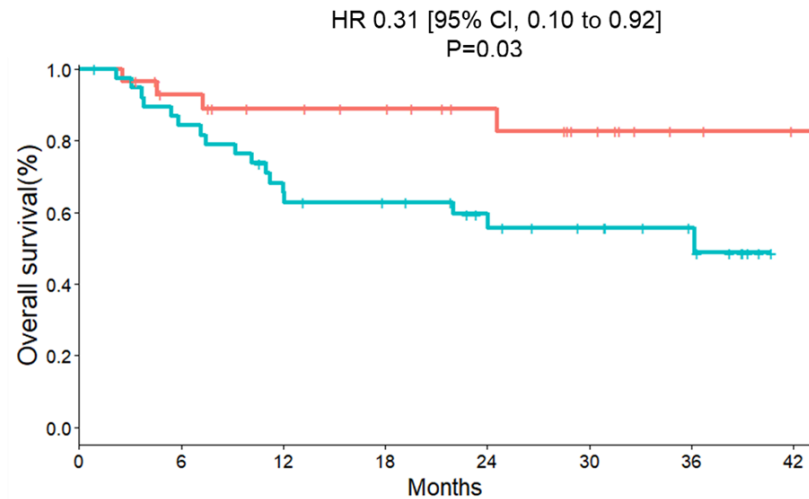

| Number at risk |    | 0  | 6  | 12 | 18 | 24 | 30 | 36 | 42 |
|----------------|----|----|----|----|----|----|----|----|----|
| —              | 29 | 24 | 20 | 18 | 14 | 10 | 5  | 3  |    |
| —              | 39 | 32 | 24 | 21 | 16 | 12 | 8  | 0  |    |

Supplementary Figure 16. **Disease outcomes after development of pneumonitis.** (a) Progression-free (PFS) and (b) overall survival (OS) after the development of pneumonitis and discontinuation of durvalumab among patients who experienced early-onset pneumonitis (<3 months) versus late-onset pneumonitis (≥3 months). Data are presented as the hazard ratio (HR) with error bars showing 95% confidence interval. HR and P-values were calculated using unadjusted Cox proportional hazard regression models. NR, not reached. Source data are provided as a Source Data file.

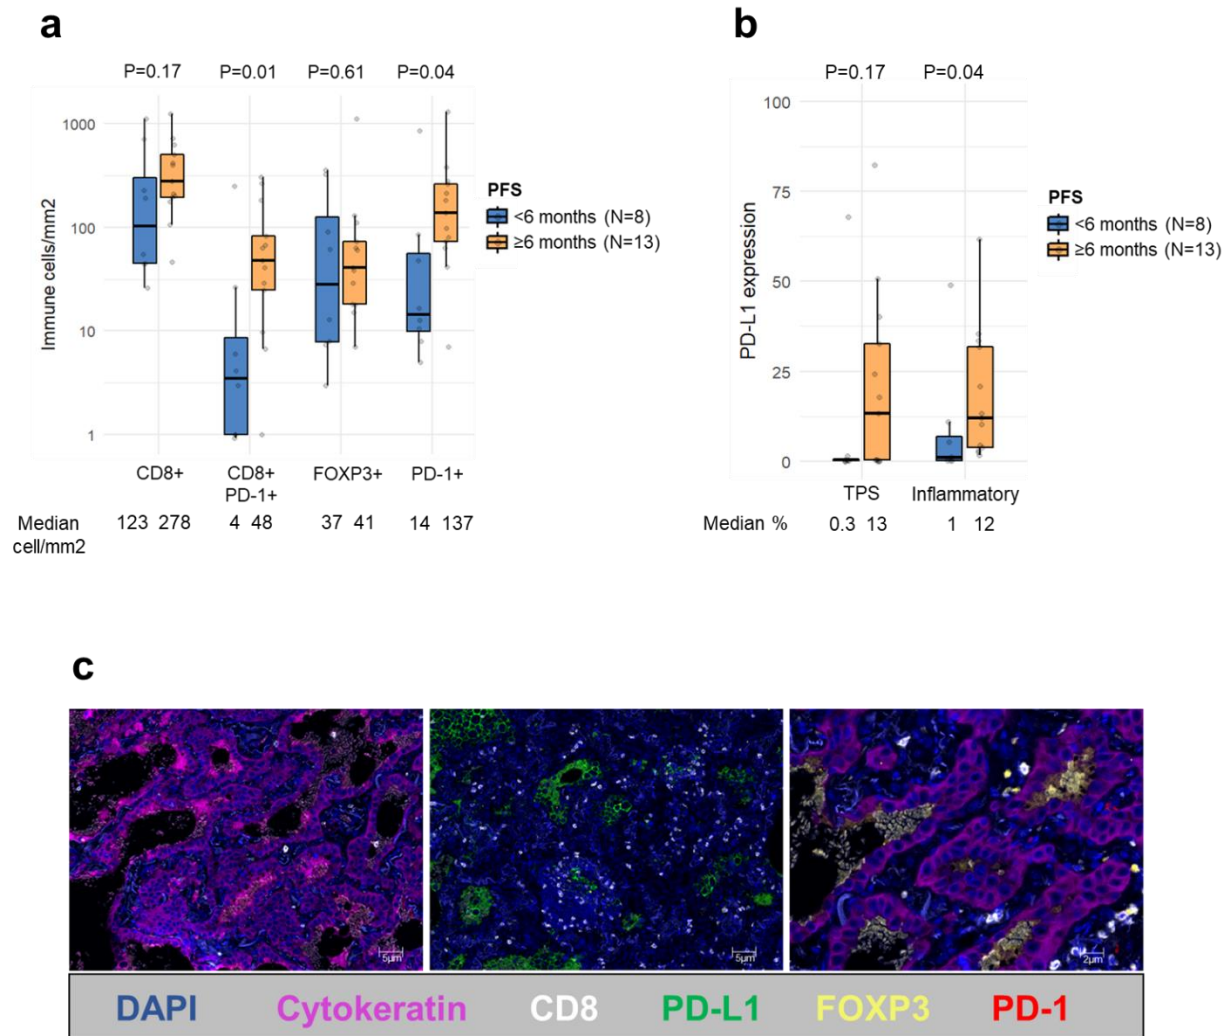

Supplementary Figure 17. **Tumor immunophenotype and disease outcomes.** (a) Median number of tumor-associated immune cells (CD8+, double positive PD-1+ CD8+, FOXP3+, and PD-1+ immune cells) and (b) PD-L1 expression on tumor and immune cells in NSCLCs from patients who experienced mPFS  $\geq$  or  $<$ 6 months as best response to durvalumab. (c) Multiplexed immunofluorescence using the ImmunoProfile platform on 3 samples from NSCLCs. P-values are according to Wilcoxon-rank test for a and b. Bounds of box plots correspond to interquartile range (IQR, 25<sup>th</sup> percentile). The upper limit of whiskers is the largest value within 1.5 times IQR range above 75<sup>th</sup> percentile. The lower limit of whiskers is the smallest value within 1.5 times IQR below 25<sup>th</sup> percentile. Source data are provided as a Source Data file.

**Supplementary Table 1.** Clinicopathologic and genomic characteristics of 328 patients who received durvalumab after chemoradiotherapy by academic center.

| <b>Clinical Characteristic</b>             | <b>DFCI<br/>N=148 (%)</b> | <b>MSKCC<br/>N=180 (%)</b> |
|--------------------------------------------|---------------------------|----------------------------|
| <b>Age, median (range)</b>                 | 69 (44-86)                | 67 (45-86)                 |
| <b>Sex</b>                                 |                           |                            |
| Male                                       | 65 (43.9)                 | 105 (58.3)                 |
| Female                                     | 83 (54.1)                 | 75 (41.7)                  |
| <b>ECOG</b>                                |                           |                            |
| PS 0                                       | 35 (23.6)                 | 92 (51.1)                  |
| PS 1                                       | 96 (64.9)                 | 88 (48.9)                  |
| PS 2                                       | 17 (11.5)                 | 0                          |
| <b>Smoking status</b>                      |                           |                            |
| Current/Former                             | 139 (93.9)                | 174 (96.7)                 |
| Never                                      | 9 (6.1)                   | 6 (3.3)                    |
| <b>Histology</b>                           |                           |                            |
| Nonsquamous                                | 105 (70.9)                | 123 (68.3)                 |
| Squamous                                   | 43 (29.1)                 | 57 (31.7)                  |
| <b>Oncogene Driver (NSQ)*</b>              |                           |                            |
| KRAS                                       | 38 (42.2)                 | 37 (43.5)                  |
| EGFR                                       | 3 (3.3)                   | 0 (0.0)                    |
| Others                                     | 9 (10.0)                  | 9 (10.6)                   |
| None identified                            | 40 (44.5)                 | 39 (45.9)                  |
| Not assessed                               | 15                        | 38                         |
| <b>TMB (mut/Mb), median (range)±</b>       | 9.9 (1.5-42.5)            | 8.8 (0-68.5)               |
| <b>PD-L1 TPS</b>                           |                           |                            |
| ≥90%                                       | 21 (16.7)                 | 19 (12.8)                  |
| 50-89%                                     | 32 (25.4)                 | 29 (19.6)                  |
| 1-49%                                      | 34 (27.0)                 | 41 (27.7)                  |
| <1%                                        | 39 (31.0)                 | 59 (39.9)                  |
| Not assessed                               | 22                        | 32                         |
| <b>Stage (AJCC 8<sup>th</sup> Edition)</b> |                           |                            |
| IIIA                                       | 73 (49.3)                 | 48 (26.7)                  |
| IIIB                                       | 56 (37.8)                 | 102 (56.7)                 |
| IIIC                                       | 19 (12.8)                 | 30 (16.7)                  |
| <b>Radiation dose</b>                      |                           |                            |
| 54-58.4 Gy                                 | 8 (5.4)                   | 4 (2.2)                    |
| 60 Gy                                      | 109 (73.7)                | 156 (86.7)                 |
| 62-70 Gy                                   | 31 (20.9)                 | 20 (11.1)                  |
| <b>Chemotherapy regimen</b>                |                           |                            |
| Carboplatin + Paclitaxel                   | 70 (47.3)                 | 81 (45.0)                  |
| Carboplatin + Pemetrexed                   | 27 (18.2)                 | 48 (26.7)                  |
| Cisplatin + Pemetrexed                     | 37 (25.0)                 | 35 (19.4)                  |
| Cisplatin + Etoposide                      | 14 (9.5)                  | 16 (8.9)                   |

\*NSQ: nonsquamous; 175 cases with comprehensive genomic profiling.

Other driver mutations: ALK, BRAF, MET, and HER2/

±TMB assessed by DFCI-OncoPanel (N=99) and MSK-IMPACT (N=109).

**Supplementary Table 2.** Clinicopathologic characteristics of patients who discontinued durvalumab due to pneumonitis and from patients who did not experience pneumonitis.

| Clinical Characteristic                    | Discontinued<br>N=68 (%) | Not discontinued<br>N=260 (%) | P-value |
|--------------------------------------------|--------------------------|-------------------------------|---------|
| <b>Age</b>                                 |                          |                               |         |
| ≥70y                                       | 35 (51.5)                | 118 (45.4)                    | 0.41    |
| <70y                                       | 33 (48.5)                | 142 (54.6)                    |         |
| <b>Sex</b>                                 |                          |                               |         |
| Male                                       | 28 (41.2)                | 142 (54.6)                    | 0.06    |
| Female                                     | 40 (58.8)                | 118 (45.4)                    |         |
| <b>T Stage</b>                             |                          |                               |         |
| 0                                          | 10 (14.7)                | 38 (14.6)                     | 0.69    |
| 1                                          | 14 (20.6)                | 49 (18.8)                     |         |
| 2                                          | 9 (13.2)                 | 46 (17.7)                     |         |
| 3                                          | 18 (26.5)                | 51 (19.6)                     |         |
| 4                                          | 17 (25.0)                | 76 (29.2)                     |         |
| <b>N Stage</b>                             |                          |                               |         |
| 0                                          | 5 (7.4)                  | 8 (3.1)                       | 0.39    |
| 1                                          | 3 (4.4)                  | 14 (5.3)                      |         |
| 2                                          | 37 (54.4)                | 157 (60.4)                    |         |
| 3                                          | 23 (33.8)                | 81 (31.2)                     |         |
| <b>Stage (AJCC 8<sup>th</sup> Edition)</b> |                          |                               |         |
| IIIA                                       | 26 (38.2)                | 95 (36.5)                     | 0.88    |
| IIIB                                       | 31 (45.6)                | 127 (48.9)                    |         |
| IIIC                                       | 11 (16.2)                | 38 (14.6)                     |         |
| <b>Radiation dose</b>                      |                          |                               |         |
| 54-58.4 Gy                                 | 0                        | 12 (4.6)                      | 0.20    |
| 60 Gy                                      | 57 (91.6)                | 208 (80.0)                    |         |
| 62-70 Gy                                   | 11 (8.4)                 | 40 (15.4)                     |         |
| <b>RT PTV**, median (range)</b>            | 535 (92-1370)            | 482 (87-1450)                 | 0.56    |
| <b>Chemotherapy regimen</b>                |                          |                               |         |
| Carboplatin + Paclitaxel                   | 32 (47.0)                | 119 (45.8)                    | 0.77    |
| Carboplatin + Pemetrexed                   | 15 (22.1)                | 60 (23.1)                     |         |
| Cisplatin + Pemetrexed                     | 13 (19.1)                | 59 (22.7)                     |         |
| Cisplatin + Etoposide                      | 8 (11.8)                 | 22 (8.4)                      |         |
| <b>Number of days*</b>                     |                          |                               |         |
| <42                                        | 33 (48.5)                | 114 (43.8)                    | 0.58    |
| ≥42                                        | 35 (51.5)                | 146 (56.2)                    |         |

RT PTV; The Radiotherapy Planning Target Volume (cm<sup>3</sup>). \*\*Data available for 180 patients from MSKCC cohort.

\*Number of days between end of radiation and durvalumab infusion.

Differences in clinicopathologic characteristics were compared using Pearson's  $\chi^2$ -test or Fisher's exact test.

Source data are provided as a Source Data file.

**Supplementary Table 3. Univariable and multivariable Cox regression analysis.**

| Progression-free survival                                 | Univariate Hazard Ratio [95%CI] | P-value | Multivariate Hazard ratio [95%CI] | P-value |
|-----------------------------------------------------------|---------------------------------|---------|-----------------------------------|---------|
| <b>Pneumonitis*</b><br>(Discontinued vs Not discontinued) | 0.95 [0.63-1.43]                | 0.79    | 0.85 [0.51-1.42]                  | 0.55    |
| <b>ECOG</b>                                               |                                 |         |                                   |         |
| PS 0                                                      | Reference                       | -       | Reference                         | -       |
| PS 1                                                      | 1.42 [1.03-1.95]                | 0.03    | 1.55 [1.03-2.34]                  | 0.03    |
| PS 2                                                      | 1.76 [0.84-3.69]                | 0.13    | 3.37 [1.23-9.21]                  | 0.02    |
| <b>Stage AJCC 8th</b>                                     |                                 |         |                                   |         |
| IIIA                                                      | Reference                       | -       | Reference                         | -       |
| IIIB                                                      | 1.62 [1.13-2.31]                | 0.008   | 1.48 [0.91-2.41]                  | 0.11    |
| IIIC                                                      | 2.09 [1.34-3.27]                | 0.001   | 2.24 [1.26-4.00]                  | 0.006   |
| <b>TMB Z-score**</b>                                      | 0.66 [0.55-0.78]                | 2.2e-06 | 0.63 [0.53-0.76]                  | 2e-06   |
| <b>PD-L1 TPS</b>                                          |                                 |         |                                   |         |
| <1%                                                       | Reference                       | -       | Reference                         | -       |
| 1-49%                                                     | 1.16 [0.79-1.70]                | 0.45    | 1.21 [0.77-1.92]                  | 0.40    |
| 50-89%                                                    | 0.78 [0.50-1.21]                | 0.26    | 0.95 [0.59-1.58]                  | 0.92    |
| 90-100%                                                   | 0.36 [0.19-0.69]                | 0.002   | 0.43 [0.20-0.93]                  | 0.03    |
| <b>NLR</b>                                                |                                 |         |                                   |         |
| ≥5                                                        | Reference                       | -       | Reference                         | -       |
| <5                                                        | 0.63 [0.47-0.86]                | 0.004   | 0.87 [0.58-1.30]                  | 0.49    |
|                                                           |                                 |         |                                   |         |
| Overall survival                                          | Univariate Hazard Ratio [95%CI] | P-value | Multivariate Hazard ratio [95%CI] | P-value |
| <b>Pneumonitis*</b><br>(Discontinued vs Not discontinued) | 1.14 [0.70-1.87]                | 0.60    | 1.34 [0.69-2.60]                  | 0.39    |
| <b>ECOG</b>                                               |                                 |         |                                   |         |
| PS 0                                                      | Reference                       | -       | Reference                         | -       |
| PS 1                                                      | 1.44 [0.91-2.26]                | 0.12    | 1.39 [0.76-2.54]                  | 0.28    |
| PS 2                                                      | 2.85 [1.18-6.91]                | 0.02    | 3.67 [1.11-12.1]                  | 0.04    |
| <b>Stage AJCC 8th</b>                                     |                                 |         |                                   |         |
| IIIA                                                      | Reference                       | -       | Reference                         | -       |
| IIIB                                                      | 1.34 [0.82-2.20]                | 0.24    | 1.46 [0.73-2.91]                  | 0.28    |
| IIIC                                                      | 1.99 [1.09-3.66]                | 0.03    | 1.85 [0.82-4.16]                  | 0.13    |
| <b>TMB Z-score**</b>                                      | 0.80 [0.63-1.03]                | 0.08    | 0.82 [0.65-1.06]                  | 0.14    |
| <b>PD-L1 TPS</b>                                          |                                 |         |                                   |         |
| <1%                                                       | Reference                       | -       | Reference                         | -       |
| 1-49%                                                     | 0.80 [0.47-1.35]                | 0.40    | 0.61 [0.29-1.23]                  | 0.16    |
| 50-89%                                                    | 0.81 [0.46-1.43]                | 0.47    | 1.09 [0.54-2.21]                  | 0.81    |
| 90-100%                                                   | 0.31 [0.12-0.79]                | 0.01    | 0.40 [0.13-1.19]                  | 0.09    |
| <b>NLR</b>                                                |                                 |         |                                   |         |
| ≥5                                                        | Reference                       | -       | Reference                         | -       |
| <5                                                        | 0.61 [0.39-0.94]                | 0.02    | 0.76 [0.42-1.37]                  | 0.36    |

\*Pneumonitis: time-dependent adjusted. TMB Z-score\* as continuous variable.

Data are presented as the hazard ratio (HR) with error bars showing 95% confidence interval. Cox proportional hazards models were used to estimate hazard ratios in univariable and multivariable models for progression-free survival (PFS) and overall survival (OS). P-values are according to log-rank test. Source data are provided as a Source Data file.

**Supplementary Table 4.** Clinicopathologic characteristics of patients who discontinued durvalumab due to pneumonitis (early vs late) and from patients who did not experience pneumonitis.

| Clinical Characteristic                    | Early-onset<br>N=39 (%) | Late-onset<br>N=29 (%) | Not discontinued<br>N=260 (%) | P-value |
|--------------------------------------------|-------------------------|------------------------|-------------------------------|---------|
| <b>Age</b>                                 |                         |                        |                               |         |
| ≥70y                                       | 19 (48.7)               | 16 (55.2)              | 118 (45.4)                    | 0.58    |
| <70y                                       | 20 (51.3)               | 13 (44.8)              | 142 (54.6)                    |         |
| <b>Sex</b>                                 |                         |                        |                               |         |
| Male                                       | 17 (43.6)               | 11 (37.9)              | 142 (54.6)                    | 0.13    |
| Female                                     | 22 (56.4)               | 18 (62.1)              | 118 (45.4)                    |         |
| <b>T Stage</b>                             |                         |                        |                               |         |
| 0                                          | 4 (10.3)                | 6 (20.7)               | 38 (14.6)                     | 0.67    |
| 1                                          | 9 (23.1)                | 5 (17.2)               | 49 (18.8)                     |         |
| 2                                          | 7 (17.9)                | 2 (6.9)                | 46 (17.7)                     |         |
| 3                                          | 11 (28.2)               | 7 (24.1)               | 51 (19.6)                     |         |
| 4                                          | 8 (20.5)                | 9 (31.0)               | 76 (29.2)                     |         |
| <b>N Stage</b>                             |                         |                        |                               |         |
| 0                                          | 2 (5.1)                 | 3 (10.3)               | 8 (3.1)                       | 0.55    |
| 1                                          | 1 (2.6)                 | 2 (6.9)                | 14 (5.3)                      |         |
| 2                                          | 22 (56.4)               | 15 (51.7)              | 157 (60.4)                    |         |
| 3                                          | 14 (35.9)               | 9 (31.0)               | 81 (31.2)                     |         |
| <b>Stage (AJCC 8<sup>th</sup> Edition)</b> |                         |                        |                               |         |
| IIIA                                       | 13 (33.3)               | 13 (44.8)              | 95 (36.5)                     | 0.59    |
| IIIB                                       | 21 (53.9)               | 10 (34.5)              | 127 (48.9)                    |         |
| IIIC                                       | 5 (12.8)                | 6 (20.7)               | 38 (14.6)                     |         |
| <b>Radiation dose</b>                      |                         |                        |                               |         |
| 54-58.4 Gy                                 | 0                       | 0                      | 12 (4.6)                      | 0.22    |
| 60 Gy                                      | 35 (89.7)               | 22 (75.9)              | 208 (80.0)                    |         |
| 62-70 Gy                                   | 4 (10.3)                | 7 (24.1)               | 40 (15.4)                     |         |
| <b>RT PTV**, median (range)</b>            | 515 (92-1310)           | 547 (161-1370)         | 482 (87-1450)                 | 0.82    |
| <b>Chemotherapy regimen</b>                |                         |                        |                               |         |
| Carboplatin + Paclitaxel                   | 17 (43.6)               | 15 (51.7)              | 119 (45.8)                    | 0.90    |
| Carboplatin + Pemetrexed                   | 11 (28.2)               | 4 (13.8)               | 60 (23.1)                     |         |
| Cisplatin + Pemetrexed                     | 7 (17.9)                | 6 (20.7)               | 59 (22.7)                     |         |
| Cisplatin + Etoposide                      | 4 (10.3)                | 4 (13.8)               | 22 (8.4)                      |         |
| <b>Number of days*</b>                     |                         |                        |                               |         |
| <42                                        | 19 (48.7)               | 14 (48.3)              | 114 (43.8)                    | 0.79    |
| ≥42                                        | 20 (51.3)               | 15 (51.7)              | 146 (56.2)                    |         |

RT PTV; The Radiotherapy Planning Target Volume (cm3). \*\*Data available for 180 patients from MSKCC cohort.

\*Number of days between end of radiation and durvalumab infusion.

Differences in clinicopathologic characteristics were compared using Pearson's X2-test or Kruskal-test when appropriate. Source data are provided as a Source Data file.

**Supplementary Table 5.** PD-L1 antibody clones and dilution of antibodies for immunohistochemistry staining.

| <b>Antibody</b> | <b>Clone</b> | <b>Company</b> | <b>Antibody Dilution</b> |
|-----------------|--------------|----------------|--------------------------|
| <b>PD-L1</b>    | E1L3N        | Cell Signaling | 1:300                    |
|                 | 22C3         | Dako           | 1:200                    |
|                 | SP263        | Ventana        | 1:200                    |

**Supplementary Table 6.** Target antigens, antibody clones, and dilution of antibodies for multiplexed immunofluorescence staining.

| <b>Antibody</b>    | <b>Clone</b> | <b>Company</b> | <b>Antibody Dilution</b> |
|--------------------|--------------|----------------|--------------------------|
| <b>CD8</b>         | 4B11         | Leica          | 1:200                    |
| <b>PD-L1</b>       | E1L3N        | Cell Signaling | 1:300                    |
| <b>FOXP3</b>       | D608R        | Cell Signaling | 1:100                    |
| <b>PD-1</b>        | EPR4877(2)   | Abcam          | 1:300                    |
| <b>Cytokeratin</b> | AE1/AE3      | Agilent        | 1:100                    |
